# Supplementary material for: Environmental Factors Controlling Zooplankton Communities in Thermokarst Lakes of the Bolshezemelskaya Tundra Permafrost Peatlands (NE Europe)
Source: MDPI journal article supplement (doi:10.3390/w15030511), 2023-01-27
Supplement: s1 [file s1]

**Table S1.** Zooplankton species composition of the studied thermokarst lakes of the Bolshezemelskaya tundra (Accepted abbreviations: NM-Naryan-Mar site, SH-Shapkino site, KV-Khorey-Ver site).

## ROTIFERA

**Asplanchnidae:** 1) *Asplanchna priodonta* Gosse, 1850 –NM, SH, KV; 2) *A. herricki* Guerne, 1888 – NM, KV.

**Brachionidae:** 3) *Kellicottia longispina* Kellicott, 1879 – NM, SH, KV; 4) *Keratella cochlearis* Gosse, 1851 – SH; 5) *K. quadrata* O.F. Müller, 1786 – NM.

**Euchlanidae:** 6) *Euchlanis lyra* Hudson, 1886 – NM, SH.

**Synchaetidae:** 7) *Polyarthra longiremis* Carlin, 1943 – KV; 8) *P. dolichoptera* Idelson, 1925 – NM, SH; 9) *Bipalpus hudsoni* Imhof, 1891 – NM.

**Conochilidae:** 10) *Conochilus unicornis* Rousselet, 1892 – NM, SH, KV.

**Filiniidae:** 11) *Filinia terminalis* Plate, 1886 – KV.

**Trichocercidae:** 12) *Trichocerca rattus* O.F. Müller, 1776 – NM, SH.

**Lecanidae:** 13) *Lecane luna* O.F. Müller, 1776 – NM.

## CLADOCERA

**Daphniidae:** 14) *Daphnia cristata* Sars, 1862 – SH; 15) *D. galeata* G.O. Sars, 1864 – SH; 16) *D. longispina* O.F. Müller, 1785 – NM, SH, KV; 17) *D. longiremis* G.O. Sars, 1862 – NM, SH, KV; 18) *D. obtusa* Kurz, 1875 – KV; 19) *D. pulex* Leydig, 1860 – NM, SH; 20) *D. middendorffiana* Fischer, 1851 – NM, SH, KV; 21) *Ceriodaphnia rotunda* Sars, 1862 – NM, SH; 22) *C. quadrangula* O.F. Müller, 1785 – NM, SH; 23) *Scapholeberis mucronata* O.F. Müller, 1776 – NM, SH, KV; 24) *Simocephalus vetulus* O.F. Müller, 1776 – NM, SH, KV.

**Bosminidae:** 25) *Bosmina crassicornis* P.E. Müller, 1867 – KV; 26) *B. coregoni* Baird, 1857 – SH, KV; 27) *B. longispina* Leydig, 1860 – NM, SH, KV; 28) *B. longirostris* O.F. Müller, 1785 – SH, KV; 29) *B. obtusirostris* Sars, 1861 – NM, SH, KV.

**Chydoridae:** 30) *Chydorus sphaericus* O.F. Müller, 1785 – NM, SH, KV; 31) *Alona quadrangularis* O.F. Müller, 1785 – NM, SH, KV; 32) *A. affinis* Leydig, 1860 – NM, HV; 33) *Acroperus harpae* Baird, 1834 – SH, KV; 34) *Pleuroxus trigonellus* O.F. Müller, 1785 – KV; 35) *Alonella nana* Baird, 1857 – SH; 36) *Alonopsis elongata* Sars 1862 – SH; 37) *Oxyurella tenuicaudis* Sars, 1862 – SH, KV.

**Eurycercidae:** 38) *Eurycercus lamellatus* O.F. Müller, 1785 – NM.

**Sididae:** 39) *Sida crystallina* O.F. Müller, 1776 – SH; 40) *Limnospira frontosa* Sars, 1862 – NM, SH, KV.

**Holopedidae:** 41) *Holopedium gibberum* Zaddach, 1855 – NM, SH, KV.

**Macrothricidae:** 42) *Macrothrix hirsuticornis* Norman et Brady, 1867 – NM, SH, KV.

**Ophryoxidae:** 43) *Ophryoxus gracilis* G.O. Sars, 1862 – NM, KV.

**Polyphemidae:** 44) *Polyphemus pediculus* Linne, 1778 – NM, SH, KV.

## COPEPODA

**Diaptomidae:** 45) *Eudiaptomus gracilis* Sars, 1863 – NM, SH, KV; 46) *Arctodiaptomus wierzejskii* Richard, 1888 – KV; 47) *Acanthodiaptomus denticornis* Wierzejski, 1887 – NM; 48) *Rhabdodiaptomus (A.) acutilobatus* G.O. Sars 1903 – KV, NM.

**Centropagidae:** 49) *Limnocalanus macrurus* Sars, 1863 – KV.

**Temoridae:** 50) *Hetercope appendiculata* Sars, 1863 – NM, SH, KV; 51) *Hetercope borealis* Fischer, 1851 – SH, KV.

**Cyclopidae:** 52) *Eucyclops serrulatus* Fischer, 1851 – NM, SH, KV; 53) *Macrocyclus albidus* Jurine, 1820 – NM, SH, KV; 54) *Acanthocyclops vernalis* Fischer, 1853 – SH, KV; 55) *Paracyclops fimbriatus* Fischer, 1853 – KV; 56) *Megacyclops viridis* Jurine, 1820 – NM, SH, KV; 57) *Cyclops scutifer* Sars, 1863 – NM, SH, KV; 58) *C. abyssorum* Sars, 1863 – KV; 59) *C. kolensis* Lilljeborg, 1901 – KV.

**Canthocamptidae:** 60) *Canthocamptus* sp. – SH, KV.

Note: NM-Naryan-Mar site, SH-Shapkino site, KV-Khorey-Ver site
